# Supplementary material
Source: PubMed Central journal article supplement (PMC8027820)
Supplement: 41386_2020_904_MOESM1_ESM.pdf [file 41386_2020_904_MOESM1_ESM.pdf]

**Pituitary adenylate cyclase-activating polypeptide (PACAP) modulates dependence-induced alcohol drinking and anxiety-like behavior in male rats**

Antonio Ferragud, Ph.D.<sup>1</sup>, Clara Velazquez-Sanchez, Ph.D.<sup>1</sup>, Margaret A. Minnig, B.S.<sup>1</sup>, Valentina Sabino, Ph.D.<sup>1,\*</sup>, Pietro Cottone, Ph.D.<sup>1,\*</sup>

<sup>1</sup> Laboratory of Addictive Disorders, Departments of Pharmacology and Experimental Therapeutics and Psychiatry, Boston University School of Medicine, Boston, MA, USA; \* These two authors equally contributed to this work.

Address correspondence to:

Pietro Cottone, Ph.D.

Laboratory of Addictive Disorders

Departments of Pharmacology and Experimental Therapeutics and Psychiatry

Boston University School of Medicine

72 E. Concord St., R-618

Boston, MA 02118

cottone@bu.edu.

Or

Valentina Sabino, Ph.D.

Laboratory of Addictive Disorders

Departments of Pharmacology and Experimental Therapeutics and Psychiatry

Boston University School of Medicine

72 E. Concord St., R-612

Boston, MA 02118

vsabino@bu.edu.

**A**

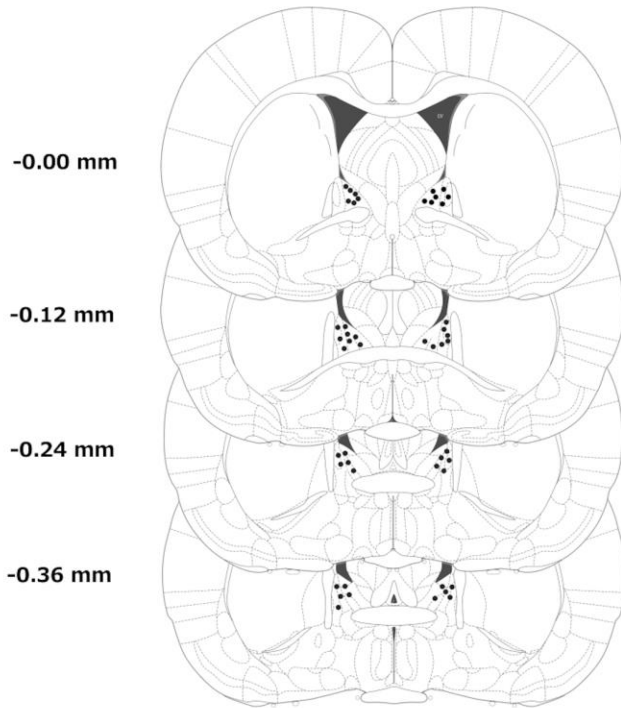

**B**

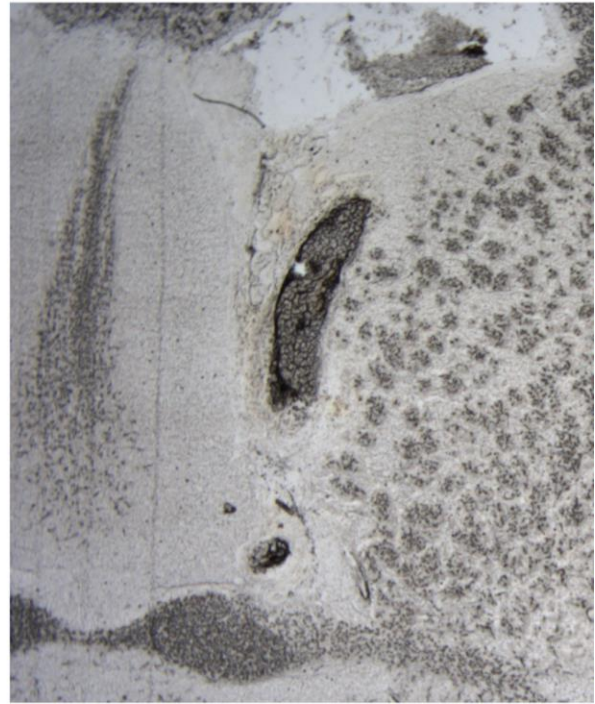

**Supplemental Fig. 1.** Drawing of coronal rat brain sections. Dots represent the injection sites in the BNST included in data analysis (A). Photomicrograph showing a coronal section of a representative injection site (B).
